# Supplementary material for: Ultrasmall C-TiO2−x nanoparticle/g-C3N4 composite for CO2 photoreduction with high efficiency and selectivity
Source: Royal Society of Chemistry journal article supplement (doi:10.1039/c8ta08091g), 2018-01-01
Supplement: c8ta08091g1.pdf [file c8ta08091g1.pdf]

## Supporting Information

### **Ultra-small C-TiO<sub>2-x</sub> Nanoparticle/g-C<sub>3</sub>N<sub>4</sub> Composite for Photo-induced CO<sub>2</sub>-to-CO Conversion with H<sub>2</sub>O**

*Jie Zhou, Han Wu, Chun-Yi Sun,\* Cheng-Ying Hu, Xin-Long Wang,\* Zhen-Hui Kang,\* and Zhong-Min Su*

#### **Materials and methods**

All reagents and solvents for the syntheses were purchased from commercial sources and used as received, unless otherwise indicated.

PXRD patterns were recorded on a Siemens D5005 diffractometer with Cu KR ( $\lambda = 1.5418 \text{ \AA}$ ) radiation in the range of 3–80°. ICP spectroscopy was conducted on Agilent 7500a Inductively Coupled Plasma Mass Spectrometry (ICP-MS 7500). TEM images were recorded on a JEM-2010 transmission electron microscope at an accelerating voltage of 200 kV. SEM images were recorded on XL-30 ESEM-FEG Scanning Electron Microscope. The elemental mappings of the samples were determined by EDX equipped on SEM with the type of Genesis 2000. UV–Vis absorption spectroscopy was obtained on U-3010 spectrophotometer (Hitachi, Japan). Infrared spectra were obtained from KBr pellets in a wavelength ranging from 4000–400 cm<sup>-1</sup> on a Nicolet 380 FT-IR spectrophotometer. XPS was performed using an Escalab 250 instrument. Nitrogen gas porosimetry measurements were performed on an automatic volumetric adsorption equipment (ASIQM0G002-3) and porosity analyzer after the samples were outgassed under a vacuum at 70 °C for 6 h. Emission lifetime measurements were performed on photon technology international quanta master/time master TM 400 phosphorescence/fluorescence Spectrofluoromete. The gas product in photocatalytic reaction was measured by Shimadzu Gas Chromatography.

## Synthesis procedure of some catalysts in Table 1

**Preparation of TiO<sub>2-x</sub> photocatalyst (Entry 3).** At room temperature, 2 g of the P25 was mixed with 4 g of NaBH<sub>4</sub> and the mixture was ground for 30 min thoroughly. Then the mixture was placed in a porcelain boat and heated in a tubular furnace for 1 h at 350 °C with a heating rate of 5 °C·min<sup>-1</sup> under Ar atmosphere. After naturally cooling down to room temperature, the TiO<sub>2-x</sub> was obtained. The obtained sample was washed with deionized water and absolute ethanol for several times and then vacuum drying with 60 °C.

**Preparation of TiO<sub>2</sub>@g-C<sub>3</sub>N<sub>4</sub> photocatalyst (Entry 4).** At room temperature, 200 mg g-C<sub>3</sub>N<sub>4</sub> and 12 mg P25 was dispersed in a mixture of 100 mL deionized water and ethanol (v:v = 1:1) under stirring for 4 h. The suspension was transferred to a 250 mL Teflon-lined reactor heating in an oven at 180 °C for 12 h. After naturally cooling down to room temperature, the TiO<sub>2</sub>@g-C<sub>3</sub>N<sub>4</sub> was obtained. The obtained sample was washed with deionized water and absolute ethanol for several times and then vacuum dry with 60 °C.

**Preparation of TiO<sub>2</sub>@g-C<sub>3</sub>N<sub>4</sub> photocatalyst by traditional hydrothermal method (Entry 5).** At room temperature, 200 mg g-C<sub>3</sub>N<sub>4</sub> and 3 ml titanium isopropoxide (0.01 mol) was dispersed in a mixture of 100 mL solution containing 50 mL of ethanol, 10ml acetic acid and 40 mL of deionized water, followed by stirring for 30 min until a suspension was formed. The suspension was transferred to a 250 mL Teflon-lined reactor heating in an oven at 180 °C for 72 h. After naturally cooling down to room temperature, the TiO<sub>2</sub>@g-C<sub>3</sub>N<sub>4</sub> was obtained. The obtained sample was washed with deionized water and absolute ethanol for several times and then vacuum drying with 60 °C. The content of TiO<sub>2</sub> was 4.9 % by ICP.

**Preparation of TiO<sub>2-x</sub>@g-C<sub>3</sub>N<sub>4</sub> photocatalyst by Zhou et al (Entry 6).** 0.5 g of P25 was mixed with 100 mL of 10 M NaOH aqueous solution. The suspension was transferred to a 250 mL Teflon-lined autoclave and maintained at 180 °C for 72 h. The obtained products were washed thoroughly with deionized water and immersed in 0.1 M HCl aqueous solution for 24 h. Then the samples were immersed in a 0.02 M H<sub>2</sub>SO<sub>4</sub> aqueous solution and maintained at 100 °C for 10 h. Then, the products were washed with deionized water for several times and dried at 70 °C for 10 h. A given amount of melamine was ground with the TiO<sub>2</sub> (weight ratios of TiO<sub>2</sub> to melamine: 1:10). And then, the mixture was calcined in a muffle furnace for 2 h at 550 °C with a heating rate of 20 °C·min<sup>-1</sup> in air atmosphere. Afterwards 1 g of the prepared sample was mixed with 2 g of NaBH<sub>4</sub> and the mixture was ground for 30 min thoroughly. Finally the mixture was placed in a porcelain boat and heated in a tubular furnace for 1 h at 350 °C under Ar atmosphere. After naturally cooling down to room temperature, the TiO<sub>2-x</sub>@g-C<sub>3</sub>N<sub>4</sub> was obtained. The obtained sample was washed with deionized water and absolute ethanol for several times and then vacuum drying with 60 °C. The content of TiO<sub>2</sub> was 6.7 % by ICP.

### The detailed operation of enlargement experiment:

The surface area of glass and volum of reaction vessels are enlarged equally. As-prepared C-TiO<sub>2-x</sub>@g-C<sub>3</sub>N<sub>4</sub> catalyst (5 mg) was dispersed in a mixture of 10 mL deionized water and ethanol (v:v = 1:1) under sonication. After heating to 70 °C, the suspension was drop-coated onto a glass of 5 × 2.5 cm<sup>2</sup>. Then the glass was moved to a five times bigger quartz photoreactor and 0.5 mL deionized water was added to keep the glass surrounded by water vapor. After bubbled with water vapor saturated CO<sub>2</sub> for 30 min, the quartz photoreactor was put into a water-cooled reactor and irradiated under visible light using a PLS-SXE300 Xe lamp with a 420 nm cutoff filter. For 10-fold and 30-fold enlargement experiment, the surface area of the glass is enlarged into 5 × 5 cm<sup>2</sup> and 7.5 × 10 cm<sup>2</sup> and the amount of catalyst and water is enlarged into the corresponding fold.

**Table S1.** Summary of the reported CO generation rate.

| Light source                                     | photocatalyst                                         | Experimental condition                                 | Generation rate ( $\mu\text{mol}\cdot\text{g}^{-1}\text{h}^{-1}$ ) | Ref.      |
|--------------------------------------------------|-------------------------------------------------------|--------------------------------------------------------|--------------------------------------------------------------------|-----------|
| UV Xe lamp 500W                                  | In-TiO <sub>2</sub>                                   | He, CO <sub>2</sub> and H <sub>2</sub> O vapor, 100 °C | 81.25                                                              | 1         |
| 250 < $\lambda$ < 400 nm                         | Cu-doped TiO <sub>2</sub> -SiO <sub>2</sub>           | CO <sub>2</sub> and H <sub>2</sub> O vapor             | 20.3                                                               | 2         |
| UV Xe lamp 300W                                  | g-C <sub>3</sub> N <sub>4</sub> -N-TiO <sub>2</sub>   | CO <sub>2</sub> and H <sub>2</sub> O vapor             | 14.73                                                              | 3         |
| 400 nm < $\lambda$                               | I-doped TiO <sub>2</sub> nanoparticles                | CO <sub>2</sub> and H <sub>2</sub> O vapor             | 2.4                                                                | 4         |
| 400 nm < $\lambda$                               | Cu, I co-doped TiO <sub>2</sub> nanoparticles         | CO <sub>2</sub> and H <sub>2</sub> O vapor             | 10.8                                                               | 5         |
| 200 < $\lambda$ < 1000 nm                        | MgO-TiO <sub>2</sub> microspheres                     | CO <sub>2</sub> and H <sub>2</sub> O vapor 150 °C      | 30.0                                                               | 6         |
| Xe lamp 300W sun-like radiation                  | TiO <sub>2</sub> /graphitic carbon                    | CO <sub>2</sub> and H <sub>2</sub> O vapor             | 10.05                                                              | 7         |
| Xe lamp 300W 420 nm $\leq$ $\lambda$             | C-TiO <sub>2-x</sub> @g-C <sub>3</sub> N <sub>4</sub> | CO <sub>2</sub> and H <sub>2</sub> O vapor             | 205.0                                                              | This work |
| Xe lamp 300W 200 $\leq$ $\lambda$ $\leq$ 1000 nm | C-TiO <sub>2-x</sub> @g-C <sub>3</sub> N <sub>4</sub> | CO <sub>2</sub> and H <sub>2</sub> O vapor             | 375.0                                                              | This work |

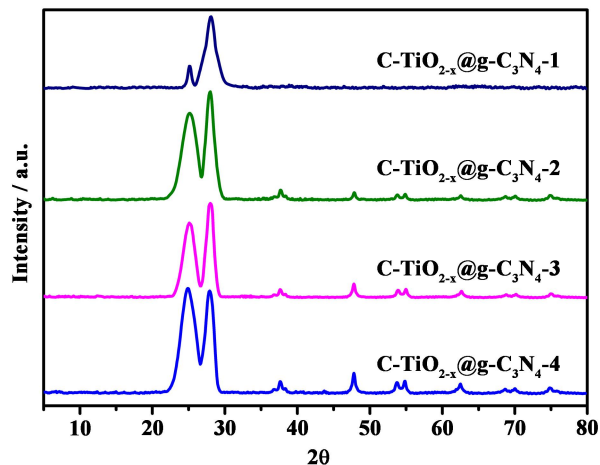

**Figure S1.** Powder X-ray diffraction (PXRD) of the C-TiO<sub>2-x</sub>@g-C<sub>3</sub>N<sub>4</sub> with the different of C-TiO<sub>2-x</sub> content.

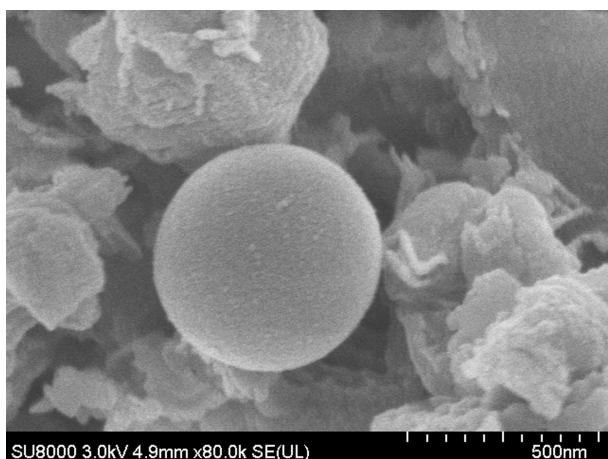

**Figure S2.** Scanning electron micrographic (SEM) by synthesizing in traditional hydrothermal method of TiO<sub>2</sub>@g-C<sub>3</sub>N<sub>4</sub>.

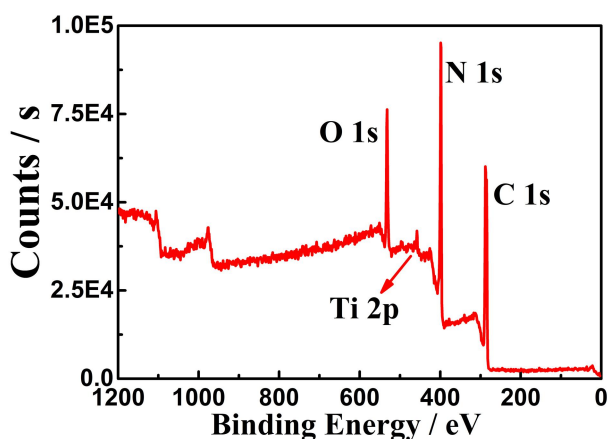

**Figure S3.** XPS spectrum of the composited of C-TiO<sub>2-x</sub>@g-C<sub>3</sub>N<sub>4</sub> hybrid.

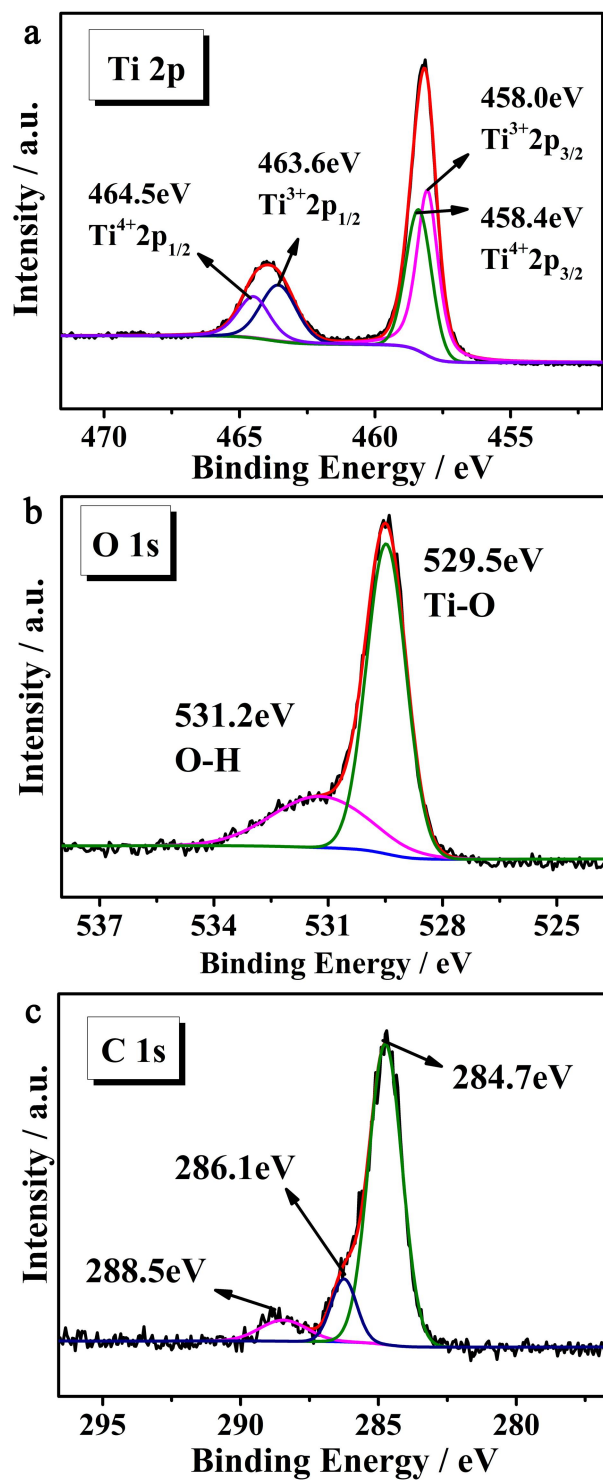

Figure S4. XPS spectrum of the composited of C-TiO<sub>2-x</sub>.

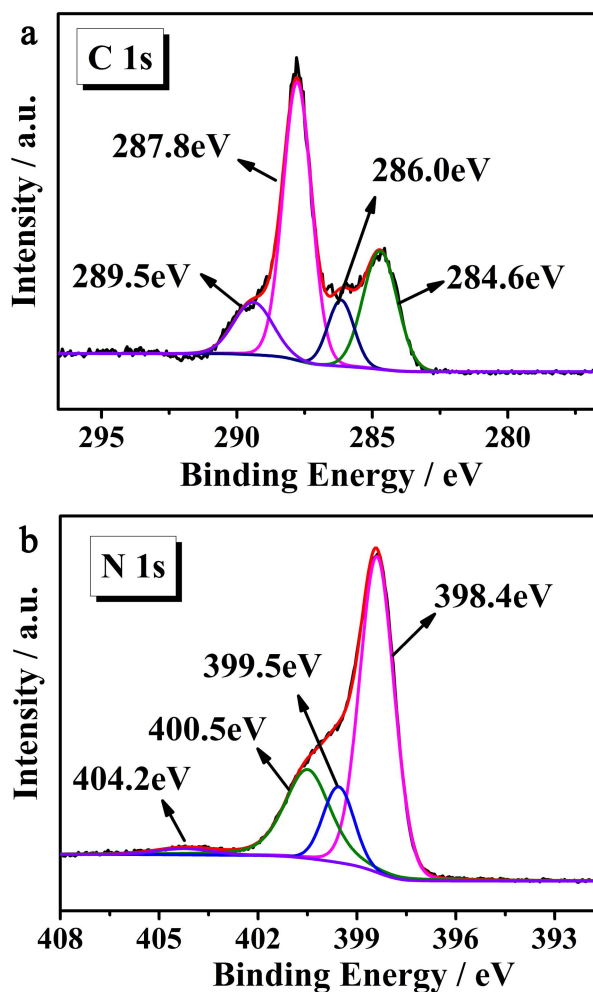

**Figure S5.** XPS spectrum of the composite of the  $g\text{-C}_3\text{N}_4$ .

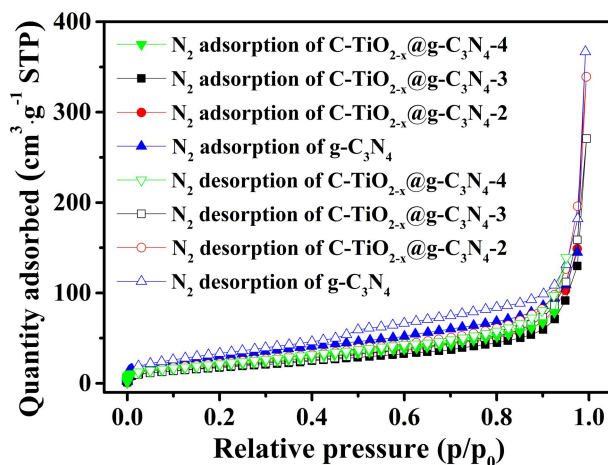

**Figure S6.** Gas isotherms adsorption.  $\text{N}_2$  adsorption–desorption isotherms for pure  $g\text{-C}_3\text{N}_4$  and composite sample with  $\text{C-TiO}_{2-x}@g\text{-C}_3\text{N}_4\text{-2}$ , 3, 4. The data are plotted based on the total weights of materials.

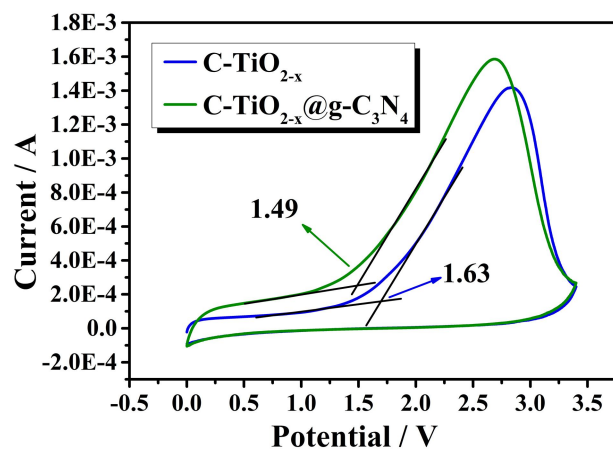

**Figure S7.** Cyclic voltammograms of C-TiO<sub>2-x</sub> and C-TiO<sub>2-x</sub>@g-C<sub>3</sub>N<sub>4</sub> (solvent: acetonitrile, atmosphere: N<sub>2</sub>).

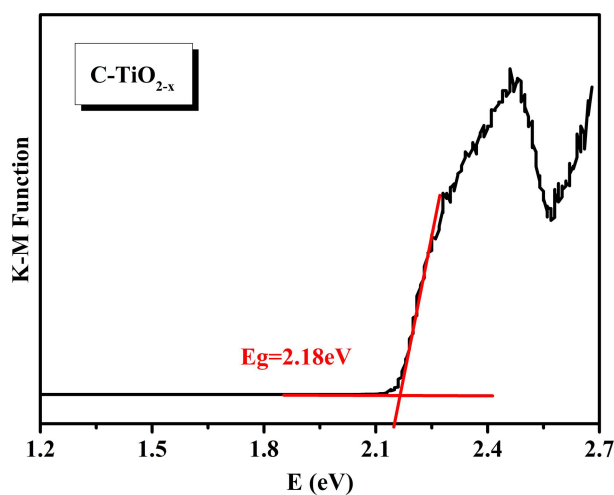

**Figure S8.** Band structure diagram for C-TiO<sub>2-x</sub>.

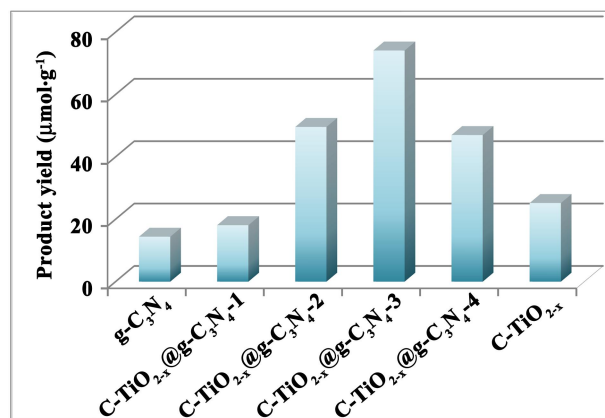

**Figure S9.** Photocatalytic performance for H<sub>2</sub> generation with different catalyst.

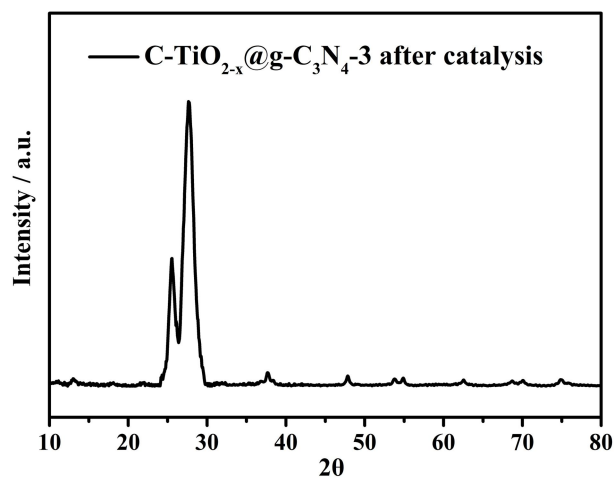

**Figure S10.** Powder X-ray diffraction (PXRD) of the after catalysis C-TiO<sub>2-x</sub>@g-C<sub>3</sub>N<sub>4</sub>-3.

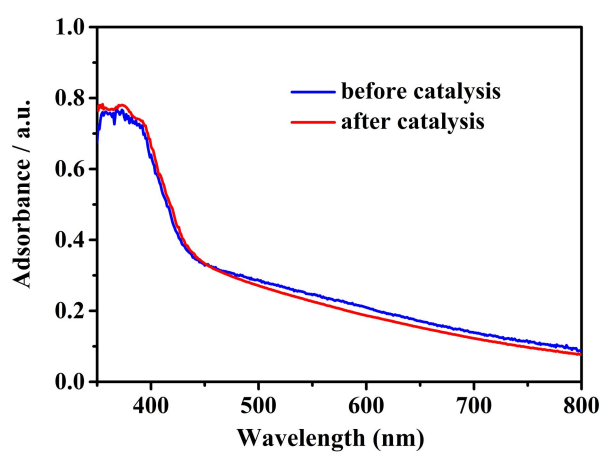

**Figure S11.** UV-visible adsorption spectra of the before and after catalysis C-TiO<sub>2-x</sub>@g-C<sub>3</sub>N<sub>4</sub>-3.

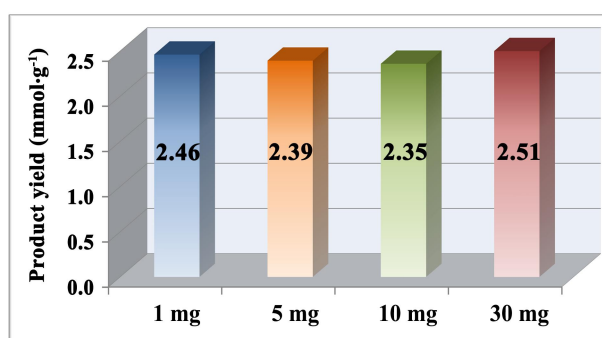

**Figure S12.** Photocatalytic performance for CO generation with different C-TiO<sub>2-x</sub>@g-C<sub>3</sub>N<sub>4</sub>-3 amount.



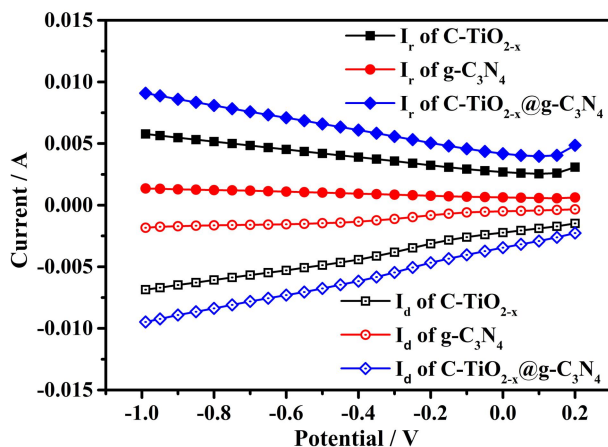

**Figure S13.** The Rotating ring-disk electrode (RRDE) experiments of using C-TiO<sub>2-x</sub>@g-C<sub>3</sub>N<sub>4</sub> as photocatalyst under rotation rates of 1600 rpm.

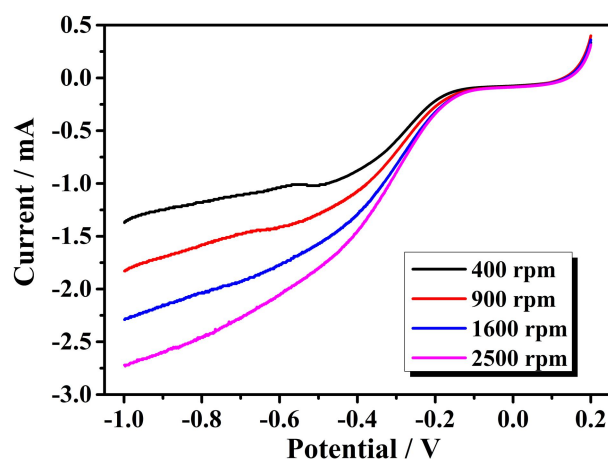

**Figure S14.** I-V curves of bare RRDE in 0.1 M KCl containing 0.01 M K<sub>3</sub>Fe(CN)<sub>6</sub> under rotation rates of: 100, 400, 900 and 1600 rpm. These curves were used to determine the collection efficiency  $N$ .

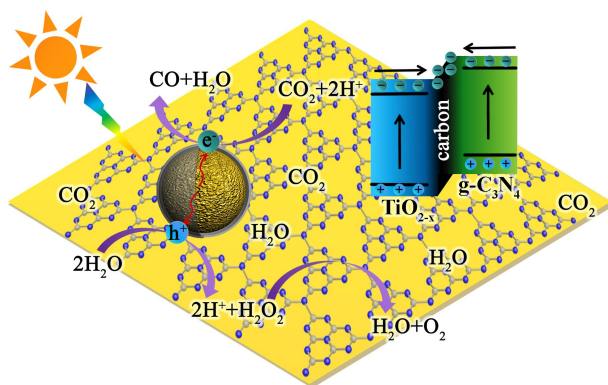

**Figure S15.** Schematic diagram of the reaction mechanism induced by C-TiO<sub>2-x</sub>@g-C<sub>3</sub>N<sub>4</sub>-3. The thin carbon layer facilitates charges separation, C-TiO<sub>2-x</sub> are the possible site for CO generation and the g-C<sub>3</sub>N<sub>4</sub> may be the oxidative site for water.

## Supplementary Reference

- [1] M. Tahir and N. S. Amin, *Appl. Catal. B*, 2015, **162**, 98-109.
- [2] W.-N. Wang, J. Park and P. Biswas, *Catal. Sci., Technol.* 2011, **1**, 593.
- [3] S. Zhou, *et al. Appl. Catal. B*, 2014, **158-159**, 20-29.
- [4] Q. Zhang and Y. Li, *Appl. Catal. A*, 2011, **400**, 195-202.
- [5] Q. Zhang, T. Gao, J. M. Andino and Y. Li, *Appl. Catal. B*, 2012, **123-124**, 257-264.
- [6] L. Liu, C. Zhao, D. Pitts, H. Zhao and Y. Li, *Catal. Sci. Technol.*, 2014, **4**, 1539-1546.
- [7] Y. Wang, *et al. Catal. Sci. Technol.*, 2013, **3**, 3286.
